1 **The genetic architecture of helminth-specific immune**  
2 **responses in a wild population of Soay sheep (*Ovis aries*).**

3 **Short title: Genetics of immune responses in a wild population of Soay sheep.**  
4

5 **A. M. Sparks<sup>1, 2\*</sup>, K. Watt<sup>1</sup>, R. Sinclair<sup>1</sup>, J. G. Pilkington<sup>1</sup>, J. M. Pemberton<sup>1</sup>, T. N. McNeilly<sup>3</sup>,**  
6 **D. H. Nussey<sup>1</sup>, S. E. Johnston<sup>1</sup>**  
7

8 <sup>1</sup> Institutes of Evolutionary Biology and Immunology and Infection Research, School of Biological  
9 Sciences, University of Edinburgh, Edinburgh, EH9 3FL, U.K.

10 <sup>2</sup> Faculty of Biological Sciences, School of Biology, University of Leeds, Leeds LS2 9JT, U.K.

11 <sup>3</sup> Moredun Research Institute, Pentlands Science Park, Bush Loan, Midlothian, EH26 0PZ, U.K.  
12

13 \* Corresponding author: Dr A. M. Sparks, [A.M.Sparks@leeds.ac.uk](mailto:A.M.Sparks@leeds.ac.uk)  
14

## 15 **Abstract**

16 Host-parasite interactions are powerful drivers of evolutionary and ecological dynamics in natural  
17 populations. Variation in immune responses to infection is likely to shape the outcome of these  
18 interactions, with important consequences for the fitness of both host and parasite. However, little is  
19 known about how genetic variation contributes to variation in immune responses under natural  
20 conditions. Here, we examine the genetic architecture of variation in immune traits in the Soay sheep  
21 of St Kilda, an unmanaged population of sheep infected with strongyle gastrointestinal nematodes. We  
22 assayed IgA, IgE and IgG antibodies against the prevalent nematode *Teladorsagia circumcincta* in the  
23 blood plasma of > 3,000 sheep collected over 26 years. Antibody levels were significantly heritable,  
24 ranging from 0.21 to 0.39 in lambs and from 0.23 to 0.57 in adults. IgA levels were strongly associated  
25 with a region on chromosome 24 explaining 21.1% and 24.5% of heritable variation in lambs and adults,  
26 respectively; this region was adjacent to two candidate loci, the Class II Major Histocompatibility  
27 Complex Transactivator (*CIITA*) and C-Type Lectin Domain Containing 16A (*CLEC16A*). Lamb IgA  
28 levels were also associated with the immunoglobulin heavy constant loci (*IGH*) complex on  
29 chromosome 18. Adult IgE levels and lamb IgG levels were associated with the major  
30 histocompatibility complex (MHC) on chromosome 20. This study provides evidence of high  
31 heritability of a complex immunological trait under natural conditions and provides the first evidence  
32 from a genome-wide study that large effect genes located outside the MHC region exist for immune  
33 traits in the wild.

## 34 **Author summary**

35 Host-parasite interactions are powerful drivers of evolutionary and ecological dynamics in natural  
36 populations. Variation in immune responses to infection shapes the outcome of these interactions, with  
37 important consequences for the ability of the host and parasite to survive and reproduce. However, little  
38 is known about how much genes contribute to variation in immune responses under natural conditions.  
39 Our study investigates the genetic architecture of variation in three antibody types, IgA, IgE and IgG in  
40 a wild population of Soay sheep on the St Kilda archipelago in North-West Scotland. Using data  
41 collected over 26 years, we show that antibody levels have a heritable basis in lambs and adults and are  
42 stable over lifetime of individuals. We also identify several genomic regions with large effects on  
43 immune responses. Our study offers the first insights into the genetic control of immunity in a wild  
44 population, which is essential to understand how immune profiles vary in challenging natural conditions  
45 and how natural selection maintains genetic variation in complex immune traits.

46

## 47 **Introduction**

48 Host-parasite interactions are powerful drivers of evolutionary and ecological dynamics in natural  
49 populations. Variation in immune responses to infection is likely to shape the outcome of these  
50 interactions, with important consequences for the fitness of both host and parasite. In the wild,  
51 individuals are exposed to a range of micro- and macro-parasites as well as variable and challenging  
52 environments, leading to considerable variation in immune phenotypes in comparison to those in  
53 controlled environments (1–3). This has the potential to alter the effect of underlying genetic variation  
54 and importance of particular genes for resistance to infection, yet little is known about the specific  
55 genetic mechanisms driving immune responses under natural conditions. By investigating the genetic  
56 architecture of immune traits in the wild, we can determine the relative contribution of genetic,  
57 environmental and individual variation to identify the evolutionary forces shaping individual  
58 differences in immunity.

59

60 Studies in humans and livestock have shown that variation in immune traits is often heritable; that is, a  
61 significant proportion of phenotypic variance can be attributed to additive genetic effects (4–11).  
62 Genome-wide association studies (GWAS) in these systems have identified a number of genes of  
63 relatively large effect contributing to heritable variation, most notably the major histocompatibility  
64 complex (MHC) and cytokine genes (12–17). In wild populations, studies have investigated the  
65 heritability of immune traits, most often in birds (18–23), with candidate gene approaches further  
66 implicating MHC and cytokine regions in cases where significant associations are observed (23–28).  
67 However, these studies often focus on broad, non-specific immune phenotypes such as the  
68 phytohaemagglutinin (PHA) response, haematocrit levels and/or parasite burden, rather than specific  
69 immune responses to ecologically-relevant parasites (29–31). In addition, candidate gene studies focus  
70 on a small proportion of the genome and may fail to identify previously undiscovered coding or  
71 regulatory regions associated with immune trait variation (32,33). To our knowledge, there are no  
72 genome-wide association studies of specific immune phenotypes in the wild.

73

74 Domestic sheep (*Ovis aries*) and their gastrointestinal strongyle nematodes represent a well-understood  
75 host-parasite system, due to their agricultural and economic importance, with much recent interest in  
76 determining the genes underlying host resistance to these parasites (34). Of the strongyle parasites,  
77 *Teladorsagia circumcincta* is of major economic importance for domestic sheep in temperate regions  
78 (35) and has a simple direct life-cycle, with an infective L3 stage which develops to L4 stage within the  
79 gastric glands before emerging as sexually mature adult parasites which reside in the abomasum.  
80 Defence against *T. circumcincta* in lambs is associated with parasite-specific IgA antibody responses  
81 directed at worm growth and subsequent female fecundity (6,36), while in older animals a  
82 hypersensitive response, involving IgE antibodies, results in expulsion of incoming larvae from the  
83 mucosa (35). Anti-*T. circumcincta* IgA levels are moderately heritable in lambs and adults (6,37,38).  
84 Candidate gene and genome-wide studies have identified regions associated with FEC or protective  
85 immunological traits related to gastrointestinal nematodes, with candidate gene studies primarily  
86 focussed on interferon gamma (*IFN* $\gamma$ ) and the MHC (34). However, due to the focus on identifying  
87 individuals for selective breeding and the greater impact of parasite infections in lambs, most studies

88 focus only on lambs, with only a few studies of adult ewes (38–41). As a consequence, we know  
89 relatively little about age-dependent genetic effects; indeed, differences in resistance loci between  
90 lambs and adults suggest that the genetic control of these mechanisms may differ (40). In both  
91 agricultural and wild systems, adult females contribute to pasture larval counts during the periparturient  
92 rise; therefore, understanding the genetic basis of resistance in young and old animals will improve our  
93 understanding of host-parasite dynamics and interactions in these systems (42).

94

95 The long-term individual-based study of the Soay sheep of St Kilda provides a powerful opportunity to  
96 understand the genetic architecture of immune traits at different ages under natural conditions. Soays  
97 are infected with several gastrointestinal strongyle nematodes common to domestic sheep,  
98 predominantly *Teladorsagia circumcincta*, *Trichostrongylus axei* and *Trichostrongylus vitrinus*  
99 (43,44). Strongyle nematode burden, in combination with harsh winter weather and low food  
100 availability, is a strong selective force on the sheep (43–46). Parasite-specific antibody responses are  
101 moderately heritable (26,47) and parasite-specific IgA levels and parasite-specific pan-isotype antibody  
102 levels have been shown to be negatively associated with strongyle faecal egg count (24,47). Recent  
103 examination of anti-nematode antibody isotypes (namely IgA, IgE and IgG) over a 26-year period  
104 showed that levels of IgG are positively associated with adult survival, and negative associations are  
105 observed between antibodies and FEC for all isotypes in lambs, but only for IgG in adults (48–50).

106

107 Previous examination of the genetic architecture of immune traits in Soay sheep using QTL mapping  
108 and candidate gene approaches failed to identify loci associated with parasite egg counts and pan-  
109 isotype antibody levels (26,51); however, a microsatellite polymorphism at the IFN $\gamma$  locus in lambs had  
110 previously been associated with reduced faecal egg counts and increased parasite-specific IgA levels  
111 (24). Today, the majority of study individuals have been genotyped on the Illumina 50K OvineSNP50  
112 BeadChip, and genome-wide association studies have identified genomic regions associated with traits  
113 such as horn morphology, body size and recombination rate (52–54). Here, we investigate the  
114 heritability and conduct genome-wide association studies of anti-*T. circumcincta* IgA, IgE and IgG  
115 levels from plasma samples collected from Soay sheep over a 26-year period. We show that antibodies

116 are heritable and temporally stable over an individual's lifetime, and that several genomic regions  
117 explain heritable variation in both lambs and adults.

118

## 119 **Methods**

### 120 **Study population**

121 The Soay sheep is a primitive breed of domestic sheep that was isolated on the island of Soay in the  
122 remote St Kilda archipelago several millennia ago, and has been living in unmanaged conditions since  
123 then (55). In 1932, >100 Soay sheep were moved to the larger island of Hirta after the evacuation of all  
124 human residents. The population now fluctuates between from 600 to 2,200 individuals. Approximately  
125 a third of the Hirta population lives in the Village Bay area, and these individuals have been the subject  
126 of a long-term study since 1985 (55). In April, around 95% of all lambs born in the study area are caught  
127 each year and individually tagged. Each August, as many sheep as possible from the study population  
128 are re-captured using temporary traps (55). At capture, whole blood samples are collected into heparin  
129 tubes, centrifuged at 3000 r.p.m. for 10 minutes, and plasma removed and stored at -20°C.

130

### 131 **Quantifying antibody levels**

132 This study quantified antibody levels in animals that were caught and blood sampled in August between  
133 1990 and 2015, comprising 6543 samples from 3190 individuals. Five samples from late-born lambs  
134 caught in August within 50 days of birth were excluded from the dataset, due to the potential presence  
135 of maternal antibodies and differences in development stage to other lambs. Levels of the antibodies  
136 IgA, IgG and IgE against antigens of the third larval stage of *Teladorsagia circumcincta* were measured  
137 using direct (IgA, IgG) and indirect (IgE) ELISAs. We used *T. circumcincta* L3 somatic antigen,  
138 provided by the Moredun Research Institute, as the capture antigen for all three assays diluted to 2µg/ml  
139 in 0.06M carbonate buffer at pH 9.6. 50µl of the diluted capture antigen was added to each well of a  
140 Nunc-immuno 96-microwell plate, which was covered and incubated at 4°C overnight. After washing  
141 the wells three times in Tris-buffered saline-Tween (TBST) using a plate washer, 50µl of the Soay

142 sheep plasma sample diluted to 1:50 for IgA and IgE, and 1:12800 for IgG was added to each well. The  
143 plates were then covered and incubated at 37°C for 1 hour. Plates were then washed five times with  
144 TBST and 50µl per well of rabbit polyclonal anti-sheep IgA detection antibody conjugated to  
145 horseradish peroxidase (HRP) (AbD Serotec AHP949P) diluted 1:16000 was added to the anti-*T.*  
146 *circumcincta* IgA assay and 50µl per well of rabbit polyclonal anti-sheep IgG detection antibody  
147 conjugated to HRP (AbD Serotec 5184-2104) diluted 1:16000 was added to the anti-*T. circumcincta*  
148 IgG assay. For the anti-*T. circumcincta* IgE assay, 50µl per well of anti-sheep IgE (mouse monoclonal  
149 IgG1, clone 2F1, provided by the Moredun Research Institute) diluted 1:100 was added, followed by 1-  
150 hour incubation at 37°C, five washes with TBST and then 50µl per well of goat polyclonal anti-mouse  
151 IgG1-HRP detection antibody (AbD Serotec STAR132P) was added diluted to 1:8000 in TBST. All  
152 plates were then incubated at 37°C for 1 hour. Plates were then washed five times with TBST and 100µl  
153 of SureBlue TMB 1-Component microwell peroxidase substrate (KPL) was added per well and left to  
154 incubate for 5 minutes in the dark at 37°C. Reactions were stopped by adding 100µl per well of 1M  
155 hydrochloric acid and optical densities (OD) were read immediately at 450nm using a Thermo Scientific  
156 GO Spectrophotometer.

157

158 All results were measured as OD values due to the lack of standard solutions. To minimise confounding  
159 of capture year and age effects with plate to plate variation, each plate included samples from two years  
160 paired at random with different age groups on each plate. All plates were run in duplicate and duplicate  
161 sample ODs were removed if the coefficient of variation was > 0.2 or the difference between ODs was  
162 greater than 0.2. We also checked the correlation of ODs across duplicate plates and re-ran both plates  
163 if  $r < 0.8$ . We included two sample free wells (50µl TBST) as blanks and two wells of positive controls  
164 on each plate. The positive control for the IgE assay was pooled serum from ewes trickle-infected with  
165 *T. circumcincta* and for the IgA and IgG assays was pooled plasma from normal healthy non-immunised  
166 domestic sheep. For subsequent analyses, the mean optical density ratio of each sample was taken  
167 according to this formula:

168

169 
$$OD = \frac{(\text{sample OD} - \text{blank OD})}{(\text{positive control OD} - \text{blank OD})}$$

170

171 where the numerator was set to zero if the blank OD was greater than the sample OD in order to avoid  
172 negative values. Distributions of antibodies are shown in Figure S1. The number of samples that failed  
173 quality control per assay was 13 for IgA (7 lambs and 6 adults), 8 for IgE (6 lambs and 2 adults) and 27  
174 for IgG (5 lambs and 22 adults). Correlations between antibody measures were modelled using linear  
175 regressions in R v3.4.3 (Figure S3).

176

## 177 **SNP data set**

178 DNA was extracted from ear tissue or buffy coats using the Qiagen DNeasy blood and tissue kit  
179 according to the manufacturer's protocol, except that a single final elution with 50ul AE buffer was  
180 used to give DNA at a concentration  $\geq 50\text{ng/ul}$ . A total of 7,386 Soay sheep have been genotyped at  
181 51,135 SNPs on the Illumina Ovine SNP50 BeadChip. Quality control was carried out using the  
182 `check.marker` function in GenABEL version 1.8-0 (56) using the following thresholds: SNP minor allele  
183 frequency (MAF)  $> 0.01$ , SNP locus genotyping success  $> 0.95$ , individual sheep genotyping success  $>$   
184  $0.95$ , identity by state with another individual  $\geq 0.95$ . Following quality control, 39,176 SNPs from  
185 7,268 sheep remained. A further 189 sheep have been genotyped at 606,066 SNP loci on the Ovine  
186 Infinium HD SNP BeadChip and were subject to the same quality control thresholds as above (see (54)  
187 for individual selection criteria). All SNP locations were taken from their estimated positions on the  
188 sheep genome assembly Oar\_v3.1 (GenBank assembly ID GCA\_000298735.1; Jiang et al. 2014).  
189 Pedigree relationships between individuals were inferred using data from 438 SNP loci in the R package  
190 Sequoia v1.02 (58) and from field observations between mothers and their offspring born within the  
191 study area (see (53) for SNP selection criteria).

192



## 193 **Animal models**

194 We modelled IgA, IgE and IgG levels in lambs and adults using a restricted maximum likelihood  
195 (REML) animal model approach (59) to determine the heritability of antibody levels in ASReml-R 3.0  
196 (60) in R v3.4.3. We analysed lambs and adults separately due to a large difference observed in antibody  
197 levels (Figure S2) and due to the expected immaturity of the immune response in 4-month-old lambs  
198 (50). Using the above SNP dataset, a genomic relatedness matrix (GRM) at all autosomal markers was  
199 constructed for all genotyped individuals using GCTA 1.90.2 beta0 (61) to determine the variance  
200 attributed to additive genetic effects (i.e. the narrow-sense heritability,  $h^2$ ). Pedigree and GRM  
201 relatedness have been shown to be highly correlated in this system (62). The GRM was adjusted using  
202 the argument `--grm-adj 0`, which assumes that allele frequencies of causal and genotyped loci are  
203 similar. The fixed effect structure for the lamb-only models included sex and age in days as a linear  
204 covariate, while the random effects included the additive genetic component, maternal identity, birth  
205 year, ELISA plate number and ELISA run date. The fixed effect structure for the adult models included  
206 sex and age in years as a linear covariate, while the random effects included permanent environment  
207 (i.e. repeated measures within an individual) and capture year effects in addition to the random effects  
208 included in the lamb model. The proportion of the phenotypic variance explained by each random effect  
209 was estimated as the ratio of the relevant variance component to the sum of all variance components  
210 (i.e. the total phenotypic variance) as estimated by the animal model. The heritability of each measure  
211 was determined as the ratio of the additive genetic variance to the total phenotypic variance. The  
212 repeatability (i.e. the between-individual variation) of each measure in the adult and all age models was  
213 determined as the ratio of the sum of the additive genetic and permanent environment variance to the  
214 total phenotypic variance.

215

## 216 **Genome-wide association studies**

217 Genome-wide association (GWA) was used to identify associations between individual single  
218 nucleotide polymorphisms (SNPs) and IgA, IgE and IgG levels in lambs and adults. This included SNPs  
219 on the X chromosome (N = 824) and those of unknown position (N = 313). For each trait and each

220 class, a total of 39,176 individual animal models were run to determine the association with each SNP  
221 locus. Each model used the same fixed effect structures as above, with SNP genotype fitted as a two or  
222 three-level factor. To speed up computational time, the GRM was replaced with a relatedness matrix  
223 based on the pedigree (which is highly correlated with the GRM in this population (62)), and ELISA  
224 plate ID and run date were removed as random effects as they explained a very small proportion of the  
225 phenotypic variance (Figure 1). Models were run in ASReml-R 3.0 (60) in R v3.4.3. P-values were  
226 corrected for any additional unaccounted-for population structure by dividing them by the genomic  
227 control parameter  $\lambda$  (63) in cases where  $\lambda > 1$ , to reduce the incidence of false positives.  $\lambda$  was calculated  
228 as the median Wald test  $\chi^2_2$  divided by the median  $\chi^2_2$  expected from a null distribution. The significance  
229 threshold after multiple testing was determined using a linkage disequilibrium-based approach with a  
230 sliding window of 50 SNPs (outlined in (64)); for a false discovery rate of  $\alpha = 0.05$ , the threshold P-  
231 value was set at  $2.245 \times 10^{-6}$  (54). Lamb IgE levels show strong right skew in their distribution (Figure  
232 S1), which can increase spurious associations at rare alleles present in individuals with large trait values.  
233 To mitigate against this, all zero trait values were removed ( $N = 394$ ), and the response variable  $\log_{10}$   
234 transformed; this correction had a negligible effect on the variance component estimates.

235

## 236 **Variance explained by significantly associated regions**

237 In regions of the genome where a SNP locus was significantly associated with an antibody measure, the  
238 proportion of phenotypic variation explained was modelled using a regional heritability approach (65).  
239 Briefly, a second GRM was constructed as above using SNP data from the most highly associated SNP  
240 in that region and the 9 SNP loci flanking that SNP on either side (i.e. 19 SNPs in total). This GRM  
241 was fitted as an additional random effect in the animal models and used to quantify the variance  
242 explained by variants within the associated region (see (54) for further details on the use of this method  
243 in Soay sheep).

244

## 245 **Imputation of SNP genotypes in associated regions**

246 Further investigation of significant associations from GWAS was carried out using an imputation  
247 approach using data from individuals typed on the Ovine Infinium HD SNP BeadChip. SNP genotypes  
248 were extracted from the HD chip  $\pm 2$ Mb on either side of all significantly associated regions. Imputation  
249 was carried out for each region in AlphaImpute v1.9.8.4 (66,67) integrating pedigree information;  
250 parameter files for each region are included in the analysis code repository (see below). SNPs with an  
251 imputation success  $>95\%$  were retained and associations between antibody levels and genotypes at each  
252 imputed SNP was calculated using the same animal model structures as outlined for the GWAS above.  
253

## 254 **Gene and gene ontology annotation in associated regions**

255 Gene annotations in significant regions were obtained from Ensembl (gene build ID Oar\_v3.1.94). Gene  
256 ontology (GO) annotations for genes occurring within 1Mb of a significantly associated SNP were  
257 obtained from humans, mice, cattle and sheep gene builds using the function *getBM* in the R package  
258 biomaRt v2.34.2 (68). For genes where the gene name was not known, orthologous genes were  
259 identified using the biomaRt function *getLDS*. For all the genes and orthologues identified within these  
260 regions, the gene names, phenotype descriptions and GO terms were queried for all terms associated  
261 with immune function and antibodies (using the strings *immun\** and *antibod\**).  
262

## 263 **Data availability**

264 Data will be archived on a publicly accessible repository. All results and data underlying the figures in  
265 this manuscript are provided as Supplementary Material. All scripts for the analysis are provided at  
266 [https://github.com/sejlab/Soay\\_Immune\\_GWAS](https://github.com/sejlab/Soay_Immune_GWAS).

267

## 268 **Results**

### 269 **Phenotypic variation and animal models**

270 August *T. circumcincta*-specific antibody levels of the three isotypes tested (IgA, IgG and IgE) were  
271 weakly positively correlated with each other, with slightly stronger correlations in lambs (adjusted  $R^2$   
272 values from 0.078 to 0.175 in lambs, and from 0.005 to 0.012 in adults,  $P < 0.001$ ; Figure S3, Table  
273 S1). Males had lower IgA levels as lambs and lower IgG levels as lambs and adults compared to females  
274 (Wald test  $P < 0.001$ , Figure S4, Table S2). All three antibody isotypes were positively associated with  
275 age in days in lambs and age in years in adults, except for adult IgG levels, which were negatively  
276 associated with age (Wald test  $P < 0.001$ , Figure S5, Table S2). Each antibody isotype was highly  
277 repeatable in adults (IgA = 0.76, IgE = 0.72, IgG = 0.52; Figure 1, Table 1), indicating some stability  
278 of individual antibody levels over the lifespan of animals. This is illustrated by a strong positive  
279 correlation between antibody measures taken in two consecutive years (IgA and IgE: slopes  $> 0.8$ ,  
280 Adjusted  $R^2 > 0.66$ ; IgG: slope = 0.52, Adjusted  $R^2 = 0.29$ ; Figure S6, Table S4). All antibody measures  
281 were heritable in lambs and adults, with IgA levels showing the highest heritabilities ( $h^2 = 0.39$  & 0.57  
282 for lambs and adults, respectively; Tables 1 & S3, Figure 1). Heritabilities in lambs and adults were  
283 0.21 and 0.47 for IgE, and 0.29 and 0.23 for IgG, respectively (Tables 1 & S3, Figure 1). There was  
284 significant variation in antibody levels among birth years in lamb IgA and IgG measures, although the  
285 effect was small ( $\leq 7\%$  of the phenotypic variance). There was a weakly significant maternal effect  
286 explaining  $< 4\%$  of variation in lamb IgA levels (Figure 1, Tables 1 & S3). In adults, capture year  
287 explained  $< 1.5\%$  of the phenotypic variance in all antibody measures. The full results of the animal  
288 models are provided in Tables S2 (fixed effect structures) and S3 (random effect structures).

289

### 290 **Genome-wide association studies**

291 Genome-wide association and regional imputation studies identified several genomic regions associated  
292 with variation in anti-*T. circumcincta* IgA, IgE and IgG levels in lambs and adults (Figures 2 and S7,  
293 Tables 2 & S5). All test statistics were corrected using the genomic control parameter  $\lambda$ ; this value was  
294 low for all 6 GWAS ( $\lambda < 1.074$ ), indicating that population structure was adequately captured by fitting

295 pedigree relatedness. Below, we discuss associations for each antibody separately, with summary  
296 information in Table 2. Full association results for genome-wide and imputed SNPs are provided in  
297 Tables S5 and S6, respectively. Information on genes and orthologues within associated regions are  
298 provided in Table S7 and immune GO terms associated with these genes are provided in Table S8.

299

300 **Anti-*T. circumcincta* IgA:** There was a strong association between IgA levels and a region between  
301 6.89 and 14.95 Mb on sheep chromosome 24, with the highest association observed at the SNP locus  
302 OAR24\_12006191.1 in both lambs and adults (Wald test  $P = 1.01 \times 10^{-31}$  and  $2.23 \times 10^{-51}$  in lambs and  
303 adults, respectively; Figures 2, 3 & S8; Tables 2 & S5). This SNP had an approximately additive effect  
304 on IgA levels in both lambs and adults (Table 2), with the region explaining 20.0% and 27.2% of the  
305 additive genetic variance in lambs and adults, respectively, equating to 7.8% and 15.3% of the  
306 phenotypic variance in lambs and adults, respectively. Associations at imputed SNPs in this region  
307 showed the strongest association at SNPs between 10.62Mb and 10.86Mb (maximum Wald test  $P =$   
308  $4.08 \times 10^{-39}$  and  $5.74 \times 10^{-71}$  in lambs and adults, respectively; Figure 3, Table S6), again with an additive  
309 effect on IgA levels (Table 2). This region corresponded to a novel gene (ENSOARG00000007156)  
310 orthologous to the protein coding gene Sorting Nexin 29 (*SNX29*; Figure 3, Table S7); GO terms  
311 indicated that this locus is associated with red blood cell phenotypes in humans and mice, including  
312 variation in haematocrit, erythrocyte cell number and circulating alkaline phosphate levels  
313 (International Mouse Phenotyping Consortium data (69); Table S8). Whilst this gene has no clear role  
314 in driving IgA levels, the associated SNPs were downstream of two candidate genes (Figure 3; Tables  
315 S7 & S8; distances of ~1.021Mb and ~709Kb, respectively): the Class II Major Histocompatibility  
316 Complex Transactivator (*CIITA*), which is described as a “master control factor” for gene expression at  
317 the major histocompatibility complex (70,71); and C-Type Lectin Domain Containing 16A (*CLEC16A*),  
318 variants at which have been associated with common variable immunodeficiency disorder and IgA  
319 deficiency (72–74). An unmapped SNP was significantly associated with IgA levels in both lambs and  
320 adults (Figure 2, chromosome ‘0’); this locus was originally mapped to the same chromosome 24 region  
321 in version 2.0 of the sheep genome.

322

323 Lamb IgA levels showed a further association at a single common SNP at the distal end of chromosome  
324 18 with an approximately additive effect on IgA levels (s03219.1, Wald test  $P = 4.34 \times 10^{-07}$ ; Figures 2  
325 & S8, Tables 2 & S5). No imputed loci passed the accuracy threshold in this region, meaning that fine  
326 mapping was not possible. Nevertheless, this SNP locus was located ~311kb to 454kb downstream of  
327 four novel genes (ENSOARG00000008862, ENSOARG00000008994, ENSOARG00000009143,  
328 ENSOARG00000009269) that are orthologous to various forms of immunoglobulin heavy constant  
329 alpha, epsilon, gamma and delta loci in humans (*IGHA*, *IGHE*, *IGHG* and *IGHD*, respectively; Tables  
330 S7 & S8). These loci code for constituent proteins of immunoglobulins and have GO terms associated  
331 with variation in IgA, IgE and IgG levels in mice (Table S8). A further association was observed at a  
332 single imputed SNP on chromosome 20, again with an approximately additive effect on IgA levels  
333 (oar3\_OAR20\_25196550, Wald test  $P = 1.96E-06$ ; Figure S8; Tables 2 & S6) and ~ 157kb directly  
334 downstream of an orthologue of the MHC II locus *HLA-DQAI*.

335

336 **Anti-*T. circumcincta* IgE:** Lamb IgE levels were associated with a gene-poor region of chromosome  
337 10, with the highest association observed at the imputed locus oar3\_OAR10\_10333145 (Figures 2 &  
338 S8, Table 2). The only protein-coding gene in this region, olfactomedin 4 (*OLFM4*), is associated with  
339 down-regulation of immune responses against bacterial infections in mice (75). However, given the low  
340 minor allele frequency of this locus, a lack of other associations at adjacent loci (Figure S8, Tables S5  
341 & S6) and no contribution of the region to additive genetic variance (Table 2), we cannot rule out that  
342 association seen here is spurious and due to the sampling of rare alleles in individuals with extreme trait  
343 values.

344

345 Adult IgE levels were associated with a region from 25.8Mb to 27.5Mb on chromosome 20, with the  
346 highest association seen at the locus OAR20\_27259292.1 for both the SNP50 and imputed SNP loci  
347 (Figures 2, Tables 2, S5 and S6). This SNP is directly upstream of the major histocompatibility complex  
348 (MHC) class II locus *HLA-DRA*, as well as the MHC class II loci *DQA* and *HLA-DQB1*; the wider  
349 region contains ~46 annotated genes with GO terms associated with immune function (Figure S8,  
350 Tables S7 & S8).

351

352 **Anti-*T. circumcincta* IgG:** Lamb IgG levels were significantly associated with a region from 29.6 –  
353 30.9Mb on chromosome 20, with the highest association observed at the imputed locus  
354 oar3\_OAR20\_30876754 (Figures 2 & S8, Table 2). This region was ~4Mb from the region associated  
355 with IgE levels in adults and was close to protein coding regions orthologous to MHC Class I genes  
356 (Figure S8, Tables S7 & S8). A further association was observed on chromosome 16, corresponding to  
357 a region containing *CD180*, a gene associated with variation in IgG2b levels in mice (76) (Table S8),  
358 although the minor allele frequency of associated SNP is low (MAF = 0.036) and the association may  
359 again be partly driven by sampling effects (Table 2). There was no association between adult IgG levels  
360 and the SNPs genotyped in this study (Figure 2).

361

## 362 **Discussion**

363 This study is one of the first to examine the genetic architecture of immune traits using a genome-wide  
364 association approach in a wild population. We have shown that anti-*Teladorsagia circumcincta* IgA,  
365 IgE and IgG levels in Soay sheep show substantial heritable variation underpinned by several genomic  
366 regions containing immune-associated genes. This suggests that antibody phenotypes have the potential  
367 to respond rapidly to selection, but also demonstrates that individual sheep develop distinct, temporally  
368 stable antibody phenotypes despite marked annual variation in exposure to nematode parasites, food  
369 availability and climate conditions (43,77,78). Below, we discuss the genetic architecture of these traits  
370 in more detail and how our findings inform the broader field of understanding the evolution and adaptive  
371 potential of immune traits in both domestic and natural populations.

372

### 373 **Temporal stability of antibody levels**

374 We observed a large increase in anti-*Teladorsagia circumcincta* antibody levels between lambs (aged  
375 4 months) and adults (aged >16 months). This was consistent with previous observations in this system  
376 and is probably due to the development of anti-helminth immunity with exposure over early life (24).  
377 In adults, antibody levels were stable within individuals, as indicated by high repeatabilities and strong

378 temporal correlations of antibody measures between years (Figure S6, Table S4). This low intra-  
379 individual variation is notable given the temporally and spatially variable environment that individuals  
380 experience on St Kilda. The relatively small amount of variation explained by cohort, maternal and  
381 annual effects found here suggests that temporal variation in exposure to parasites, condition or early  
382 life effects had relatively little influence on antibody levels. It is also notable that repeatabilities for  
383 each antibody isotype were high despite different isotypes being only weakly correlated with one  
384 another, suggesting complex individualised immune phenotypes which are consistent over lifetimes.  
385 Our findings are consistent with the consensus emerging from human studies, which have also  
386 determined that variation in immune parameters is driven by high inter-individual and low intra-  
387 individual variation, indicative of stable immunological profiles of individuals (79,80). Whilst most  
388 intra-individual variation in this study was attributed to additive genetic effects, the permanent  
389 environment effects were substantial, accounting for 19%, 25% and 29% of the phenotypic variance in  
390 IgA, IgE and IgG, respectively. At present, the factors contributing to this variation remain unknown,  
391 but may be driven by consistent spatial differences in exposure or individual disease history, or due to  
392 complex interactions between nutritional state, exposure to other parasites and life history during early  
393 life.

394

### 395 **Heritable variation in antibody levels**

396 Anti-*T. circumcincta* IgA, IgE and IgG levels were highly heritable in Soay sheep, ranging from 0.21  
397 to 0.39 in lambs and from 0.23 to 0.57 in adults. These estimates are comparable to previous work  
398 estimating the pedigree heritability of an anti-*T. circumcincta* pan-isotype antibody measure (likely to  
399 be mainly comprised of IgG) in Soay sheep lambs ( $h^2 = 0.30$ ) and adults ( $h^2 = 0.13 - 0.39$ ) (26,47). In  
400 domestic sheep, similar heritability estimates have been obtained for anti-*T. circumcincta* IgE in Texel  
401 lambs ( $h^2 = 0.39$  and  $0.50$  against the third and fourth stage larvae, respectively (5)) and anti-*T.*  
402 *circumcincta* IgA in Scottish Blackface lambs ( $h^2 = 0.56$  against fourth stage larvae (6)). The  
403 observation that immune traits in Soay sheep and domestic breeds appear to have substantial heritable  
404 variation is interesting from an evolutionary perspective, as selection for reduced parasite load is likely



405 to be strong, which in turn is predicted to reduce underlying genetic variation and hence the heritability  
406 of quantitative traits (81). In domestic sheep, anti-helminthic treatments may have relaxed the selection  
407 pressure on immune traits. Alternatively, the observed high heritabilities in both domestic and wild  
408 sheep may be in accordance with theory predicting that stabilising selection, rather than directional  
409 selection, is likely to be acting on immune traits (82), which in turn may lead to the maintenance of  
410 genetic variation at the underlying trait loci. In the Soay sheep, we have shown with the same dataset  
411 that there is little evidence for stabilising selection, with directional selection present for IgG in adults  
412 but not for other isotypes or age groups (50). It is notable that adult IgG, as well as being under the  
413 strongest directional selection, also has the lowest heritability compared to other isotypes and age  
414 groups (Figure 1, Table 1). This is consistent with the prediction that directional selection should erode  
415 heritable variation, whilst the high observed heritabilities in general are consistent with observations of  
416 weak or variable selection on these antibody measures (50). Nevertheless, a full understanding of the  
417 mechanisms maintaining this genetic variation will require examination of association between  
418 genotypes at significant loci with individual fitness, i.e. survival and reproductive success.

419

#### 420 **Genetic variants associated with antibody levels**

421 The strongest association observed in this study was between lamb and adult IgA levels and a region  
422 on chromosome 24 corresponding to the gene *SNX29*. This gene has no previous association with  
423 immune trait variation (see above) but occurs downstream of two candidate genes. The first, *CIITA*, is  
424 a master regulator of MHC class II gene expression; overexpression of *CIITA* in rats can induce  
425 transcription of MHC Class II genes in nearly all cell types (83) and *CIITA* knockout mice show  
426 impaired MHC Class II expression (84). Mutations in *CIITA* in humans are associated with bare  
427 lymphocyte syndrome type II, a severe primary immunodeficiency caused by the absence of MHC class  
428 II gene expression (85). In addition, a human GWAS study showed an association with variants at  
429 *CIITA* and levels of activated T cells (i.e., HLA DR+ T lymphocytes) and is in linkage disequilibrium  
430 with disease variants associated with ulcerative colitis (12). The second candidate, *CLEC16A*, is almost  
431 directly adjacent to *CIITA* and has been associated with IgA deficiency and common variable

432 immunodeficiency disorder characterised by inadequate levels of multiple antibody isotypes (72–74).  
433 Further, *CLEC16A* knockdown mice have a reduced number of B cells and increased IgM levels  
434 compared with controls (73). Despite *CIITA* and *CLEC16A* being strong candidate genes for IgA  
435 expression *a priori*, they lie ~1 & 0.7 Mb upstream from the GWAS peak, respectively (Figure 3). We  
436 cannot rule out that variants in protein-coding regions at *SNX29* and adjacent loci may drive IgA  
437 expression. However, a more plausible hypothesis is that the associated region contains cis-regulatory  
438 elements affecting the expression of *CIITA* and/or *CLEC16A*. Direct evidence of the precise cis-  
439 regulatory regions driving gene expression is scarce, but there is increasing evidence that genes can  
440 have multiple cis-regulatory regions driving expression (86), and that cis-regulatory regions can occur  
441 at distances of >1Mb from their target genes (see Orsolya & François 2013 and references therein).

442

443 The non-MHC variants identified in this study have not previously been associated with anti-*T.*  
444 *circumcincta* IgA, IgE or IgG levels in other sheep breeds investigated to date. A genome-wide  
445 association study in Scottish Blackface lambs failed to identify any SNPs associated with *T.*  
446 *circumcincta* IgA (37), while a study in Spanish Churra ewes found one genome-wide significant SNP  
447 on chromosome 12 (40). A quantitative trait locus (QTL) mapping study in Romney lambs found total  
448 IgE and anti-*Trichostrongylus colubriformis* IgG levels were each associated with a region on  
449 chromosome 23 (88). Together with our results, it appears that QTL for parasite-specific antibody traits  
450 have not been consistently observed between sheep breeds. This may be due to different loci associated  
451 with immune responses at different ages, differences in host-parasite exposure, inherent differences  
452 between breeds driven by different selective breeding histories, and/or genetic drift (26,40,89).  
453 Alternatively, there may be differences in the power to detect trait loci due to differences in patterns of  
454 linkage disequilibrium, effect sizes, sample sizes and/or analytical approaches between the studies. The  
455 loci identified in the current study may also be due to a genotype-by-environment effect that may only  
456 be manifested under natural conditions or could have been introduced with a historical admixture event  
457 with the Dunface breed (90). Investigation of candidate causal mutations in the current study will shed  
458 light on the mechanisms driving antibody levels within Soays, as well as their ubiquity and origin across  
459 different sheep breeds.

460

461 The identification of several large effect loci is in contrast with GWAS studies on body size and fitness-  
462 related traits in wild populations which have found few, if any, associations of SNPs with quantitative  
463 traits (27,53,91–95). This is because wild studies are subject to limitations related to sample size,  
464 environmental heterogeneity and marker density, which may fail to identify trait loci, over-estimate  
465 effect sizes and/or generate spurious associations (e.g. as stated above for observed associations at rare  
466 variants for lamb IgE and IgG on chromosomes 16 and 10, respectively) (96). We believe our overall  
467 findings are robust for the following reasons. This study has one of the highest sample sizes of any  
468 GWAS conducted in a wild system, with ~2,000 measures in lambs and ~3,800 measures in ~1300  
469 unique adults, and sampling studies in this population suggest that causal variants contributing to  
470 heritable variation are adequately tagged by the Ovine SNP50 BeadChip (53,62). The extent of LD  
471 between genotyped SNP loci allowed successful imputation of high-density SNP loci in almost all  
472 significant regions of the genome, providing sufficient power to fine-map loci of large effect on immune  
473 phenotypes (53). We acknowledge that reduced LD in some regions (such as on chromosome 18 for  
474 lamb IgA) may mean that some regions of the genome are less able to tag heritable variation, potentially  
475 leading to reduced power to detect some trait loci. In addition, the Ovine SNP50 BeadChip has a low  
476 SNP density around the *DQA* and *DQB* loci in the MHC class II region, reducing power to detect  
477 associations (Figure S8b & S8f). Nevertheless: the quality of imputation was high within this region;  
478 other work has shown that there is no significant difference in patterns of LD and recombination rate  
479 compared to other locations within the genome (54); and traits were successfully mapped to the MHC  
480 region within the current study.

481

## 482 **Conclusion**

483 This study provides evidence of a number of major effect loci and high additive genetic variation  
484 underlying complex immune traits in a wild population of Soay sheep, and provides a foundation for  
485 determining why genetic variation persists in immune traits by investigating associations with identified  
486 trait loci with individual fitness and genomic signatures of selection. The high heritability and

487 repeatability of immune measures, as well as low correlations between them, suggests that strong targets  
488 for selection exist; a full understanding would require multivariate analysis to understand the constraints  
489 on immune phenotype evolution. Previous studies of immunity in the wild often focussed on specific  
490 immune regions (e.g. the MHC) and candidate genes encoding proteins of known immune function.  
491 Our study reveals the importance of using a genome-wide association, rather than candidate gene  
492 approach, for a clearer understanding of the genetic control of immune phenotypes. Overall, our study  
493 provides a rare example of multiple regions of large effect driving variation in immune phenotypes in  
494 the wild.

495

## 496 **Acknowledgements**

497 We thank Ian Stevenson and all Soay sheep project members and volunteers for collection of data and  
498 samples. Phil Ellis, Camillo Béréños and Hannah Lemon prepared DNA samples for Ovine SNP50  
499 BeadChip genotyping and Jisca Huisman constructed the pedigree. Feedback from Jon Slate, Andrea  
500 Graham, Adam Hayward, Rick Maizels, Alastair Wilson and Amy Pedersen greatly improved this  
501 manuscript. This work has made extensive use of the Edinburgh Compute and Data Facility  
502 (<http://www.ecdf.ed.ac.uk/>). Permission to work on St Kilda is granted by The National Trust for  
503 Scotland, and logistical support was provided by QinetiQ, Eurest and Kilda Cruises. The Soay sheep  
504 project has been supported by grants from the UK Natural Environment Research Council. SNP  
505 genotyping was funded by a European Research Council Advanced Grant to JMP. DHN was supported  
506 by a Biotechnology and Biological Sciences Research Council David Phillips Fellowship. TNM is  
507 supported by the Scottish Government Rural Affairs, Food and the Environment (RAFE) Strategic  
508 Research Portfolio 2016-2021. AMS was supported by a Medical Research Council PhD Studentship.  
509 SEJ is supported by a Royal Society University Research Fellowship.

510

## 511 **References**

- 512 1. Abolins SR, Pocock MJO, Hafalla JCR, Riley EM, Viney ME. Measures of immune function of wild  
513 mice, *Mus musculus*. *Mol Ecol*. 2011;20(5):881–92.

- 514 2. Beura LK, Hamilton SE, Bi K, Schenkel JM, Odumade OA, Casey KA, et al. Normalizing the  
515 environment recapitulates adult human immune traits in laboratory mice. *Nature*. 2016;532(7600):512–  
516 6.
- 517 3. Abolins S, King EC, Lazarou L, Weldon L, Hughes L, Drescher P, et al. The comparative immunology  
518 of wild and laboratory mice, *Mus musculus domesticus*. *Nat Commun*. 2017 May;8:14811.
- 519 4. Liston A, Carr EJ, Linterman MA. Shaping variation in the human immune system. *Trends Immunol*.  
520 2016;37(10):637–46.
- 521 5. Murphy L, Eckersall PD, Bishop SC, Pettit JJ, Huntley JF, Burchmore R, et al. Genetic variation among  
522 lambs in peripheral IgE activity against the larval stages of *Teladorsagia circumcincta*. *Parasitology*.  
523 2010;137(8):1249–60.
- 524 6. Strain SAJ, Bishop SC, Henderson NG, Kerr A, McKellar QA, Mitchell S, et al. The genetic control of  
525 IgA activity against *Teladorsagia circumcincta* and its association with parasite resistance in naturally  
526 infected sheep. *Parasitology*. 2002;124(5):545–52.
- 527 7. Christe P, De Lope F, González G, Saino N, Møller AP. The influence of environmental conditions on  
528 immune responses, morphology and recapture probability of nestling house martins (*Delichon urbica*).  
529 *Oecologia*. 2001;126(3):333–8.
- 530 8. Clapperton M, Glass EJ, Bishop SC. Pig peripheral blood mononuclear leucocyte subsets are heritable  
531 and genetically correlated with performance. *Animal*. 2008;2(11):1575–84.
- 532 9. Thompson-Crispi KA, Sewalem A, Miglior F, Mallard BA. Genetic parameters of adaptive immune  
533 response traits in Canadian Holsteins. *J Dairy Sci*. 2012;95(1):401–9.
- 534 10. Flori L, Gao Y, Oswald IP, Lefevre F, Bouffaud M, Mercat M-J, et al. Deciphering the genetic control  
535 of innate and adaptive immune responses in pig: a combined genetic and genomic study. *BMC Proc*.  
536 2011;5(Suppl 4):S32.
- 537 11. Denholm SJ, McNeilly TN, Banos G, Coffey MP, Russell GC, Bagnall A, et al. Estimating genetic and  
538 phenotypic parameters of cellular immune-associated traits in dairy cows. *J Dairy Sci*.  
539 2017;100(4):2850–62.
- 540 12. Orrù V, Steri M, Sole G, Sidore C, Viridis F, Dei M, et al. Genetic variants regulating immune cell levels  
541 in health and disease. *Cell*. 2013;155(1):242–56.
- 542 13. Roederer M, Quaye L, Mangino M, Beddall MH, Mahnke Y, Chattopadhyay P, et al. The genetic  
543 architecture of the human immune system: a bioresource for autoimmunity and disease pathogenesis.

- 544 Cell. 2015;161(2):387–403.
- 545 14. Davies G, Stear MJ, Benothman M, Abuagob O, Kerr a, Mitchell S, et al. Quantitative trait loci  
546 associated with parasitic infection in Scottish blackface sheep. *Heredity (Edinb)*. 2006;96(3):252–8.
- 547 15. Edfors-Lilja I, Wattrang E, Marklund L, Moller M, Andersson-Eklund L, Andersson L, et al. Mapping  
548 quantitative trait loci for immune capacity in the pig. *J Immunol*. 1998;161(2):829–35.
- 549 16. Lu X, Liu JF, Fu WX, Zhou JP, Luo YR, Ding XD, et al. Genome-wide association study for cytokines  
550 and immunoglobulin G in swine. *PLoS One*. 2013;8(10):1–7.
- 551 17. Thompson-Crispi KA, Sargolzaei M, Ventura R, Abo-Ismael M, Miglior F, Schenkel F, et al. A  
552 genome-wide association study of immune response traits in Canadian Holstein cattle. *BMC Genomics*.  
553 2014;15(1):559.
- 554 18. Pitala N, Gustafsson L, Sendeck J, Brommer JE. Nestling immune response to phytohaemagglutinin is  
555 not heritable in collared flycatchers. *Biol Lett*. 2007;3(4):418–21.
- 556 19. Morrison ES, Ardia DR, Clotfelter ED. Cross-fostering reveals sources of variation in innate immunity  
557 and hematocrit in nestling tree swallows *Tachycineta bicolor*. *J Avian Biol*. 2009 Nov;40(6):573–8.
- 558 20. Sakaluk SK, Wilson AJ, Bowers EK, Johnson LS, Masters BS, Johnson BG, et al. Genetic and  
559 environmental variation in condition, cutaneous immunity, and haematocrit in house wrens. *BMC Evol*  
560 *Biol*. 2014 Dec;14(1):242.
- 561 21. Kim S-Y, Fargallo JA, Vergara P, Martínez-Padilla J. Multivariate heredity of melanin-based coloration,  
562 body mass and immunity. *Heredity (Edinb)*. 2013 Aug;111(2):139–46.
- 563 22. Drobnik SM, Wiejaczka D, Arct A, Dubiec A, Gustafsson L, Cichoń M. Sex-specific heritability of  
564 cell-mediated immune response in the blue tit nestlings (*Cyanistes caeruleus*). *J Evol Biol*. 2010  
565 May;23(6):1286–92.
- 566 23. Bonneaud C, Sinsheimer JS, Richard M, Chastel O, Sorci G. MHC polymorphisms fail to explain the  
567 heritability of phytohaemagglutinin-induced skin swelling in a wild passerine. *Biol Lett*. 2009;5(6):784–  
568 7.
- 569 24. Coltman DW, Wilson K, Pilkington JG, Stear MJ, Pemberton JM. A microsatellite polymorphism in the  
570 gamma interferon gene is associated with resistance to gastrointestinal nematodes in a naturally-  
571 parasitized population of Soay sheep. *Parasitology [Internet]*. 2001;122(05):571–82. Available from:  
572 [http://journals.cambridge.org/action/displayAbstract?fromPage=online&aid=82683&fulltextType=RA&](http://journals.cambridge.org/action/displayAbstract?fromPage=online&aid=82683&fulltextType=RA&fileId=S0031182001007570)  
573 [fileId=S0031182001007570](http://journals.cambridge.org/action/displayAbstract?fromPage=online&aid=82683&fulltextType=RA&fileId=S0031182001007570)

- 574 25. Turner AK, Begon M, Jackson JA, Bradley JE, Paterson S. Genetic diversity in cytokines associated  
575 with immune variation and resistance to multiple pathogens in a natural rodent population. *PLoS Genet.*  
576 2011;7(10):e1002343.
- 577 26. Brown EA, Pilkington JG, Nussey DH, Watt KA, Hayward AD, Tucker R, et al. Detecting genes for  
578 variation in parasite burden and immunological traits in a wild population: testing the candidate gene  
579 approach. *Mol Ecol.* 2013 Feb;22(3):757–73.
- 580 27. Wenzel MA, James MC, Douglas A, Piertney SB. Genome-wide association and genome partitioning  
581 reveal novel genomic regions underlying variation in gastrointestinal nematode burden in a wild bird.  
582 *Mol Ecol.* 2015;24(16):4175–92.
- 583 28. Paterson S, Wilson K, Pemberton JM. Major histocompatibility complex variation associated with  
584 juvenile survival and parasite resistance in a large unmanaged ungulate population (*Ovis aries* L.). *Proc*  
585 *Natl Acad Sci U S A* [Internet]. 1998;95(7):3714–9. Available from:  
586 <http://www.pnas.org/content/95/7/3714.abstract>
- 587 29. Kennedy MW, Nager RG. The perils and prospects of using phytohaemagglutinin in evolutionary  
588 ecology. *Trends Ecol Evol.* 2006 Dec;21(12):653–5.
- 589 30. Owen JP, Clayton DH. Where are the parasites in the PHA response? *Trends Ecol Evol.* 2007  
590 May;22(5):228–9.
- 591 31. Schmid-Hempel P. *Evolutionary Parasitology: The Integrated Study of Infections, Immunology,*  
592 *Ecology, and Genetics.* New York: Oxford University Press; 2011.
- 593 32. Jepson A, Banya W, Sisay-Joof F, Hassan-King M, Nunes C, Bennett S, et al. Quantification of the  
594 relative contribution of major histocompatibility complex (MHC) and non-MHC genes to human  
595 immune responses to foreign antigens. *Infect Immun.* 1997 Mar;65(3):872–6.
- 596 33. Acevedo-Whitehouse K, Cunningham A a. Is MHC enough for understanding wildlife immunogenetics?  
597 *Trends Ecol Evol.* 2006 Aug;21(8):433–8.
- 598 34. Benavides MV, Sonstegard TS, Van Tassel C. Genomic regions associated with sheep resistance to  
599 gastrointestinal nematodes. *Trends Parasitol.* 2016;32(6):470–80.
- 600 35. McNeilly TN, Devaney E, Matthews JB. *Teladorsagia circumcincta* in the sheep abomasum: defining  
601 the role of dendritic cells in T cell regulation and protective immunity. *Parasite Immunol.*  
602 2009;31(7):347–56.
- 603 36. Stear MJ, Bishop SC, Doligalska M, Duncan JL, Holmes PH, Irvine J, et al. Regulation of egg

- 604 production, worm burden, worm length and worm fecundity by host responses in sheep infected with  
605 *Ostertagia circumcincta*. Parasite Immunol. 1995;17(12):643–52.
- 606 37. Riggio V, Matika O, Pong-Wong R, Stear MJ, Bishop SC. Genome-wide association and regional  
607 heritability mapping to identify loci underlying variation in nematode resistance and body weight in  
608 Scottish Blackface lambs. Heredity (Edinb) [Internet]. 2013;110(5):420–9. Available from:  
609 <http://dx.doi.org/10.1038/hdy.2012.90>
- 610 38. Gutiérrez-Gil B, Pérez J, de la Fuente LF, Meana A, Martínez-Valladares M, San Primitivo F, et al.  
611 Genetic parameters for resistance to trichostrongylid infection in dairy sheep. Animal. 2010  
612 Apr;4(4):505–12.
- 613 39. Bishop SC, Stear MJ. Inheritance of faecal egg counts during early lactation in Scottish Blackface ewes  
614 facing mixed, natural nematode infections. Anim Sci. 2001;73(3):389–95.
- 615 40. Atlija M, Arranz J-J, Martinez-Valladares M, Gutiérrez-Gil B. Detection and replication of QTL  
616 underlying resistance to gastrointestinal nematodes in adult sheep using the ovine 50K SNP array. Genet  
617 Sel Evol. 2016;48(1):4.
- 618 41. Gutiérrez-Gil B, Pérez J, Alvarez L, Martínez-Valladares M, de la Fuente L-F, Bayón Y, et al.  
619 Quantitative trait loci for resistance to trichostrongylid infection in Spanish Churra sheep. Genet Sel  
620 Evol. 2009;41:46.
- 621 42. Stear MJ, Boag B, Cattadori I, Murphy L. Genetic variation in resistance to mixed, predominantly  
622 *Teladorsagia circumcincta* nematode infections of sheep: From heritabilities to gene identification.  
623 Parasite Immunol. 2009;31(5):274–82.
- 624 43. Wilson K, Grenfell BT, Pilkington JG, Boyd HEG, Gulland FM. Parasites and their impact. In: Clutton-  
625 Brock TH, Pemberton JM, editors. Soay Sheep: Dynamics and Selection in an Island Population.  
626 Cambridge, UK: Cambridge University Press; 2004. p. 17–51.
- 627 44. Craig BH, Pilkington JG, Pemberton JM. Gastrointestinal nematode species burdens and host mortality  
628 in a feral sheep population. Parasitology. 2006;133(Pt 4):485–96.
- 629 45. Gulland FM. The role of nematode parasites in Soay sheep (*Ovis aries* L.) mortality during a population  
630 crash. Parasitology. 1992;105(3):493–503.
- 631 46. Hayward AD, Wilson AJ, Pilkington JG, Clutton-Brock TH, Pemberton JM, Kruuk LEB. Natural  
632 selection on a measure of parasite resistance varies across ages and environmental conditions in a wild  
633 mammal. J Evol Biol [Internet]. 2011 Aug [cited 2013 May 7];24(8):1664–76. Available from:



- 634 <http://www.ncbi.nlm.nih.gov/pubmed/21658142>
- 635 47. Hayward AD, Garnier R, Watt KA, Pilkington JG, Grenfell BT, Matthews JB, et al. Heritable,  
636 heterogeneous, and costly resistance of sheep against nematodes and potential feedbacks to  
637 epidemiological dynamics. *Am Nat.* 2014;184:S58-76.
- 638 48. Nussey DH, Watt KA, Clark A, Pilkington JG, Pemberton JM, Graham AL, et al. Multivariate immune  
639 defences and fitness in the wild: complex but ecologically important associations among plasma  
640 antibodies, health and survival. *Proc R Soc London B Biol Sci.* 2014;281(1779):20132931.
- 641 49. Watson RL, McNeilly TN, Watt KA, Pemberton JM, Pilkington JG, Waterfall M, et al. Cellular and  
642 humoral immunity in a wild mammal: variation with age & sex and association with overwinter  
643 survival. *Ecol Evol.* 2016 Dec;6(24):8695–705.
- 644 50. Sparks AM, Watt K, Sinclair R, Pilkington JG, Pemberton JM, Johnston SE, et al. Natural Selection on  
645 Antihelminth Antibodies in a Wild Mammal Population. 2018;192(6).
- 646 51. Beraldi D, McRae AF, Gratten J, Pilkington JG, Slate J, Visscher PM, et al. Quantitative trait loci  
647 (QTL) mapping of resistance to strongyles and coccidia in the free-living Soay sheep (*Ovis aries*). *Int J*  
648 *Parasitol* [Internet]. 2007 Jan [cited 2010 Jul 22];37(1):121. Available from:  
649 <http://www.ncbi.nlm.nih.gov/pubmed/17067607>
- 650 52. Johnston SE, Gratten J, Berenos C, Pilkington JG, Clutton-Brock TH, Pemberton JM, et al. Life history  
651 trade-offs at a single locus maintain sexually selected genetic variation. *Nature* [Internet]. 2013 Oct 3  
652 [cited 2013 Nov 7];502(7469):93–5. Available from: <http://www.ncbi.nlm.nih.gov/pubmed/23965625>
- 653 53. Béréños C, Ellis PA, Pilkington JG, Lee SH, Gratten J, Pemberton JM. Heterogeneity of genetic  
654 architecture of body size traits in a free-living population. *Mol Ecol.* 2015;24(8):1810–30.
- 655 54. Johnston SE, Béréños C, Slate J, Pemberton JM. Conserved genetic architecture underlying individual  
656 recombination rate variation in a wild population of soay sheep (*Ovis aries*). *Genetics.*  
657 2016;203(1):583–98.
- 658 55. Clutton-Brock T, Pemberton J. *Soay sheep: dynamics and selection in an island population.* Cambridge,  
659 UK: Cambridge University Press; 2004.
- 660 56. Aulchenko YS, Ripke S, Isaacs A, van Duijn CM. GenABEL: an R library for genome-wide association  
661 analysis. *Bioinformatics* [Internet]. 2007 May 15 [cited 2013 Feb 28];23(10):1294–6. Available from:  
662 <http://www.ncbi.nlm.nih.gov/pubmed/17384015>
- 663 57. Jiang Y, Xie M, Chen W, Talbot R, Maddox JF, Faraut T, et al. The sheep genome illuminates biology

- 664 of the rumen and lipid metabolism. *Science* (80- ) [Internet]. 2014 Jun 6 [cited 2014 Aug  
665 27];344(6188):1168–73. Available from: <http://www.ncbi.nlm.nih.gov/pubmed/24904168>
- 666 58. Huisman J. Pedigree reconstruction from SNP data: parentage assignment, sibship clustering and  
667 beyond. *Mol Ecol Resour*. 2017 Sep;17(5):1009–24.
- 668 59. Henderson CR. Best linear unbiased estimation and prediction under a selection model. *Biometrics*  
669 [Internet]. 1975;31:423–47. Available from: <http://www.jstor.org/stable/2529430>
- 670 60. Butler DG, Cullis BR, Gilmour AR, Gogel BJ. *Mixed Models for S language Environments: ASReml-R*  
671 *reference manual*. 2009.
- 672 61. Yang J, Lee SH, Goddard ME, Visscher PM. GCTA: a tool for genome-wide complex trait analysis. *Am*  
673 *J Hum Genet* [Internet]. 2011 Jan 7 [cited 2013 Mar 2];88(1):76–82. Available from:  
674 <http://www.pubmedcentral.nih.gov/articlerender.fcgi?artid=3014363&tool=pmcentrez&rendertype=abstract>  
675 *ract*
- 676 62. Béréanos C, Ellis P, Pilkington JG, Pemberton JM. Estimating quantitative genetic parameters in wild  
677 populations: a comparison of pedigree and genomic approaches. *Mol Ecol*. 2014;23:3434–51.
- 678 63. Devlin AB, Roeder K, Devlin B. Genomic Control for Association. *Biometrics*. 1999;55(4):997–1004.
- 679 64. Moskvina V, Schmidt KM. On multiple-testing correction in genome-wide association studies. *Genet*  
680 *Epidemiol* [Internet]. 2008;32:567–73. Available from: <http://dx.doi.org/10.1002/gepi.20331>
- 681 65. Nagamine Y, Pong-Wong R, Navarro P, Vitart V, Hayward C, Rudan I, et al. Localising Loci  
682 underlying Complex Trait Variation Using Regional Genomic Relationship Mapping. *PLoS One*.  
683 2012;7(10).
- 684 66. Antolín R, Nettelblad C, Gorjanc G, Money D, Hickey JM. A hybrid method for the imputation of  
685 genomic data in livestock populations. *Genet Sel Evol*. 2017;1–17.
- 686 67. Hickey JM, Kinghorn BP, Tier B, Werf JHJ Van Der, Cleveland MA. A phasing and imputation method  
687 for pedigreed populations that results in a single-stage genomic evaluation. 2012;1–11.
- 688 68. Durinck S, Spellman PT, Birney E, Huber W. Mapping identifiers for the integration of genomic  
689 datasets with the R/Bioconductor package biomaRt. *Nat Protoc* [Internet]. 2009/07/23. 2009;4(8):1184–  
690 91. Available from: <https://www.ncbi.nlm.nih.gov/pubmed/19617889>
- 691 69. Dickinson ME, Flenniken AM, Ji X, Teboul L, Wong MD, White JK, et al. High-throughput discovery  
692 of novel developmental phenotypes. *Nature* [Internet]. 2016;537(7621):508–14. Available from:  
693 <http://dx.doi.org/10.1038/nature19356>

- 694 70. Reith W, LeibundGut-Landmann S, Waldburger J-M. Regulation of MHC class II gene expression by  
695 the class II transactivator. *Nat Rev Immunol.* 2005 Oct;5(10):793–806.
- 696 71. Krawczyk M, Reith W. Regulation of MHC class II expression, a unique regulatory system identified by  
697 the study of a primary immunodeficiency disease. *Tissue Antigens [Internet].* 2006 Mar 1;67(3):183–97.  
698 Available from: <https://doi.org/10.1111/j.1399-0039.2006.00557.x>
- 699 72. Ferreira RC, Pan-Hammarström Q, Graham RR, Gateva V, Fontán G, Lee AT, et al. Association of  
700 IFIH1 and other autoimmunity risk alleles with selective IgA deficiency. *Nat Genet.* 2010;42(9):777–80.
- 701 73. Li J, Jørgensen SF, Maggadottir SM, Bakay M, Warnatz K, Glessner J, et al. Association of CLEC16A  
702 with human common variable immunodeficiency disorder and role in murine B cells. *Nat Commun.*  
703 2015;6:6804.
- 704 74. Bronson PG, Chang D, Bhangale T, Seldin MF, Ortmann W, Ferreira RC, et al. Common variants at  
705 PVT1, ATG13-AMBRA1, AHI1 and CLEC16A are associated with selective IgA deficiency. *Nat*  
706 *Genet.* 2016;48(11):1425–9.
- 707 75. Liu W, Yan M, Liu Y, Wang R, Li C, Deng C, et al. Olfactomedin 4 down-regulates innate immunity  
708 against *Helicobacter pylori* infection. *Proc Natl Acad Sci U S A.* 2010 Jun;107(24):11056–61.
- 709 76. Chaplin JW, Kasahara S, Clark EA, Ledbetter JA. Anti-CD180 (RP105) Activates B Cells To Rapidly  
710 Produce Polyclonal Ig via a T Cell and MyD88-Independent Pathway. *J Immunol.* 2011;187(8):4199–  
711 209.
- 712 77. Coulson T, Catchpole E a, Albon SD, Morgan BJT, Pemberton JM, Clutton-Brock TH, et al. Age, sex,  
713 density, winter weather and population crashes in Soay sheep. *Science (80- ) [Internet].* 2001 May  
714 25;292(5521):1528–31. Available from: <http://www.ncbi.nlm.nih.gov/pubmed/11375487>
- 715 78. Crawley MJ, Albon SD, Bazely DR, Milner JM, Pilkington JG, Tuke AL. Vegetation and sheep  
716 population dynamics. In: Clutton-Brock TH, Pemberton JM, editors. *Soay Sheep: Dynamics and*  
717 *Selection in an Island Population.* Cambridge: Cambridge University Press; 2004. p. 89–112.
- 718 79. Tsang JS, Schwartzberg PL, Kotliarov Y, Biancotto A, Xie Z, Germain RN, et al. Global analyses of  
719 human immune variation reveal baseline predictors of postvaccination responses. *Cell.*  
720 2014;157(2):499–513.
- 721 80. Carr EJ, Dooley J, Garcia-Perez JE, Lagou V, Lee JC, Wouters C, et al. The cellular composition of the  
722 human immune system is shaped by age and cohabitation. *Nat Immunol.* 2016;17(4):461–8.
- 723 81. Falconer DS, Mackay TFC. *Introduction to Quantitative Genetics.* 4th ed. UK: Longman; 1996.

- 724 82. Seppälä O. Natural selection on quantitative immune defence traits: a comparison between theory and  
725 data. *J Evol Biol.* 2015;28(1):1–9.
- 726 83. Mori-Aoki A, Pietrarello M, Nakazato M, Caturegli P, Kohn LD, Suzuki K. Class II Transactivator  
727 Suppresses Transcription of Thyroid-Specific Genes. *Biochem Biophys Res Commun* [Internet].  
728 2000;278(1):58–62. Available from:  
729 <http://www.sciencedirect.com/science/article/pii/S0006291X00937690>
- 730 84. Chang C-H, Guerder S, Hong S-C, van Ewijk W, Flavell RA. Mice Lacking the MHC Class II  
731 Transactivator (CIITA) Show Tissue-Specific Impairment of MHC Class II Expression. *Immunity*  
732 [Internet]. 1996 Feb 1;4(2):167–78. Available from: [https://doi.org/10.1016/S1074-7613\(00\)80681-0](https://doi.org/10.1016/S1074-7613(00)80681-0)
- 733 85. DeSandro AM, Nagarajan UM, Boss JM. Associations and interactions between bare lymphocyte  
734 syndrome factors. *Mol Cell Biol.* 2000 Sep;20(17):6587–99.
- 735 86. Diao Y, Fang R, Li B, Meng Z, Yu J, Qiu Y, et al. A tiling-deletion-based genetic screen for cis-  
736 regulatory element identification in mammalian cells. *Nat Methods.* 2017 Jun;14(6):629–35.
- 737 87. Orsolya S, François S. From remote enhancers to gene regulation: charting the genome’s regulatory  
738 landscapes. *Philos Trans R Soc B Biol Sci* [Internet]. 2013 Jun 19;368(1620):20120358. Available  
739 from: <https://doi.org/10.1098/rstb.2012.0358>
- 740 88. Crawford AM, Paterson KA, Dodds KG, Diez Tascon C, Williamson PA, Roberts Thomson M, et al.  
741 Discovery of quantitative trait loci for resistance to parasitic nematode infection in sheep: I. Analysis of  
742 outcross pedigrees. *BMC Genomics.* 2006;7:178.
- 743 89. Kijas JW, Lenstra JA, Hayes B, Boitard S, Porto Neto LR, San Cristobal M, et al. Genome-wide  
744 analysis of the world’s sheep breeds reveals high levels of historic mixture and strong recent selection.  
745 *PLoS Biol* [Internet]. 2012 Feb 7 [cited 2012 Feb 7];10(2):e1001258. Available from:  
746 <http://dx.plos.org/10.1371/journal.pbio.1001258>
- 747 90. Feulner PGD, Gratten J, Kijas JW, Visscher PM, Pemberton JM, Slate J. Introgression and the fate of  
748 domesticated genes in a wild mammal population. *Mol Ecol.* 2013;22:4210–4221.
- 749 91. Husby A, Kawakami T, Ronnegard L, Smeds L, Ellegren H, Qvarnstrom A. Genome-wide association  
750 mapping in a wild avian population identifies a link between genetic and phenotypic variation in a life-  
751 history trait. *Proc R Soc London B Biol Sci.* 2015;282(1806):20150156.
- 752 92. Johnston SE, Orell P, Pritchard VL, Kent MP, Lien S, Niemelä E, et al. Genome-wide SNP analysis  
753 reveals a genetic basis for sea-age variation in a wild population of Atlantic salmon (*Salmo salar*). *Mol*

- 754 Ecol. 2014;23:3452–68.
- 755 93. Kardos M, Husby A, McFarlane SE, Qvarnström A, Ellegren H. Whole-genome resequencing of  
756 extreme phenotypes in collared flycatchers highlights the difficulty of detecting quantitative trait loci in  
757 natural populations. *Mol Ecol Resour.* 2016;16(3):727–41.
- 758 94. Santure AW, Poissant J, De Cauwer I, Van Oers K, Robinson MR, Quinn JL, et al. Replicated analysis  
759 of the genetic architecture of quantitative traits in two wild great tit populations. *Mol Ecol.*  
760 2015;24(24):6148–62.
- 761 95. Silva CNS, McFarlane SE, Hagen IJ, Rönnegård L, Billing AM, Kvalnes T, et al. Insights into the  
762 genetic architecture of morphological traits in two passerine bird species. *Heredity (Edinb).* 2017  
763 Jun;119(3):197–205.
- 764 96. Santure AW, Garant D. Wild GWAS—association mapping in natural populations. *Mol Ecol Resour*  
765 [Internet]. 2018 Jul 1;18(4):729–38. Available from: <https://doi.org/10.1111/1755-0998.12901>  
766  
767  
768

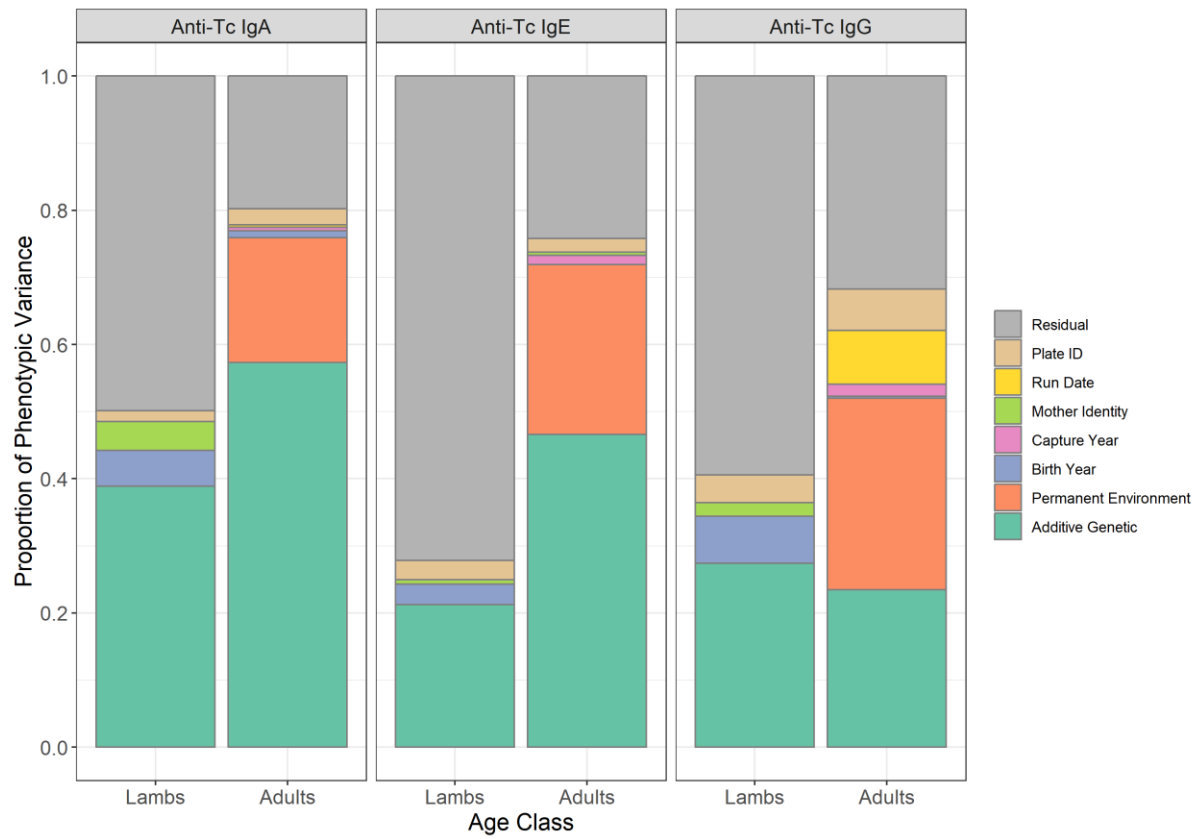

769

770 **Figure 1:** Proportion of phenotypic variance explained by random effects in animal models of anti-*T.*

771 *circumcincta* IgA, IgE and IgG levels in lamb and adult Soay sheep. Data is provided in Table 1.

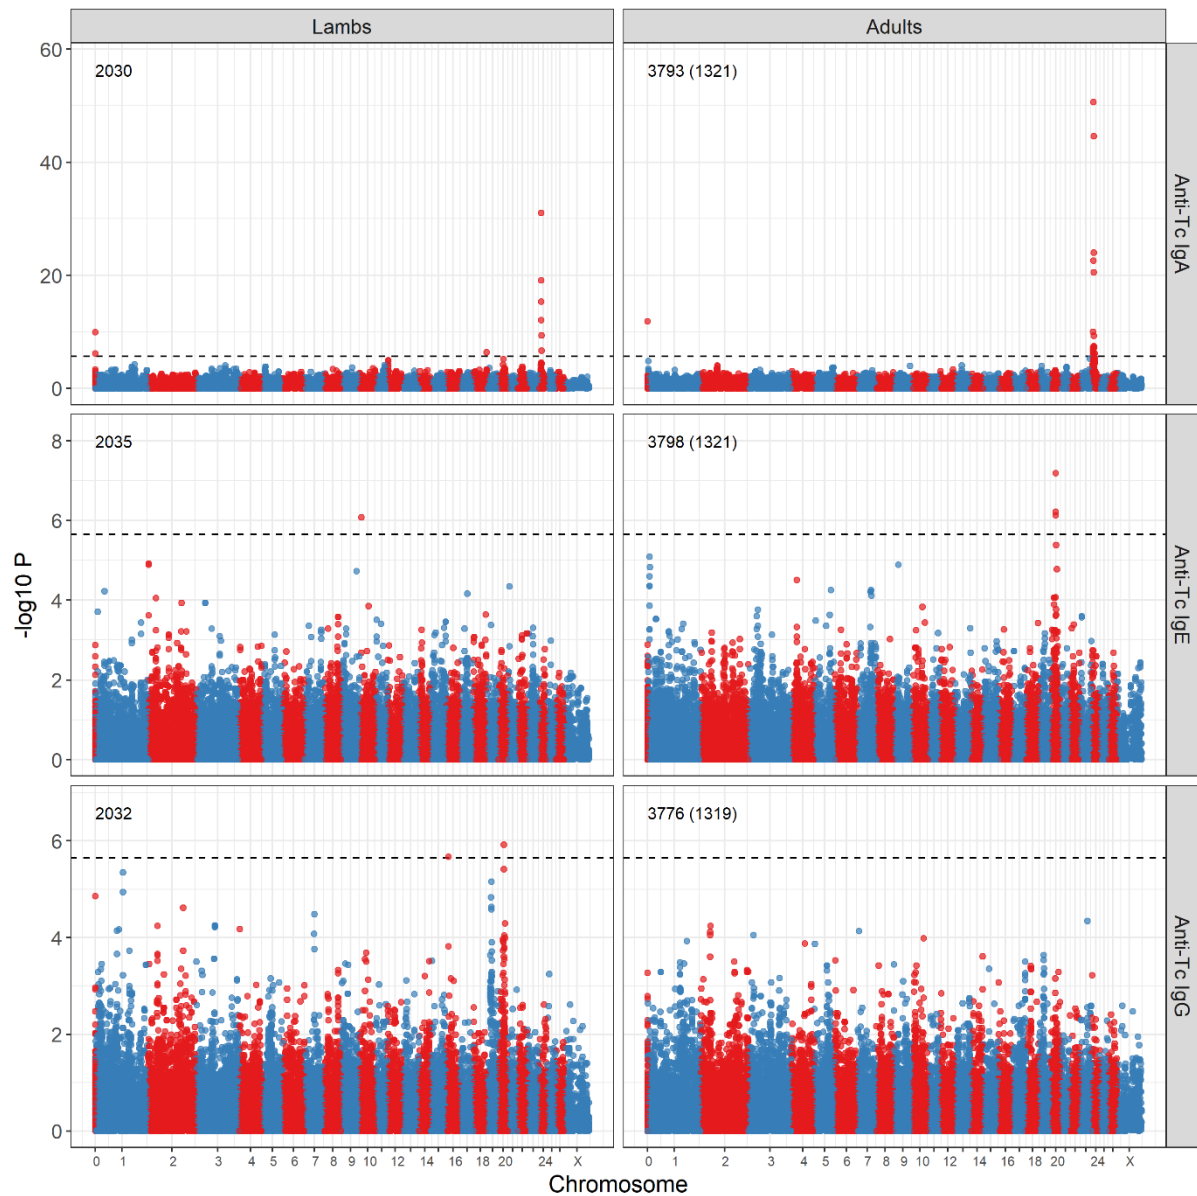

772

773 **Figure 2:** Genome-wide association of anti-*Teladorsagia circumcincta* IgA, IgE and IgG levels in lamb  
774 and adult Soay sheep with SNPs on the Ovine SNP50 BeadChip. Numbers indicate the number of  
775 measures and the number of unique individuals in parentheses. The dotted line indicates the genome-  
776 wide significance threshold equivalent to an experiment-wide threshold of  $P = 0.05$ . Points are colour-  
777 coded by chromosome. Positions are given relative to the sheep genome assembly Oar\_v3.1.  
778 Underlying data, sample sizes and effect sizes are provided in Table S5. P-values were corrected with  
779 genomic control  $\lambda$ , and comparisons with those expected under a null distribution (i.e. P-P plots) are  
780 provided in Figure S7.

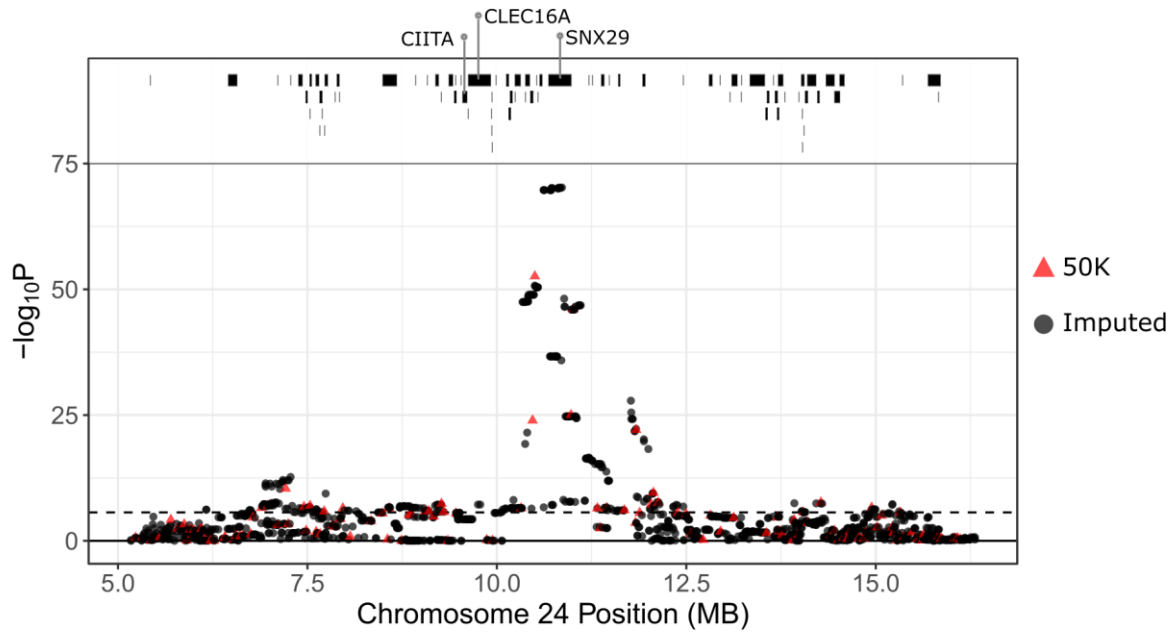

781

782 **Figure 3:** Local association of anti-*Teladorsagia circumcincta* IgA levels in adult Soay sheep with  
783 SNP50 and imputed SNP loci at the most highly associated region on chromosome 24. The dotted line  
784 indicates the genome-wide significance threshold equivalent to an experiment-wide threshold of  $P =$   
785 0.05. Points are colour-coded by their imputation status. Positions are given relative to the sheep  
786 genome assembly Oar\_v3.1. Underlying data, sample sizes and effect sizes are provided in Table S6.  
787 Gene positions were obtained from Ensembl (gene build ID Oar\_v3.1.94) and are provided in Table S7.



788 **Table 1.** Mean and variance estimates, and the proportion of variance explained for anti-*T. circumcincta* IgA, IgE and IgG levels measured in St. Kilda Soay  
789 sheep lambs and adults. Mean and  $V_{OBS}$  are the mean and variance of the raw data measures, N is the number of measures in  $N_{IDS}$  unique individuals.  $V_P$  is the  
790 phenotypic variance as a sum of all variance components as estimated by an animal model. The additive genetic effect ( $h^2$ ) indicates the narrow sense heritability  
791 of the trait. Non-significant estimates are indicated in grey text. Full results of all variance components are provided in Table S3. Figures in parentheses are  
792 standard errors.

793

| Trait       | Age    | $V_{OBS}$ | Mean  | N    | $N_{IDS}$ | $V_P$              | Proportion of $V_P$ explained |                       |                    |                    |                    |                    |                    |                    |
|-------------|--------|-----------|-------|------|-----------|--------------------|-------------------------------|-----------------------|--------------------|--------------------|--------------------|--------------------|--------------------|--------------------|
|             |        |           |       |      |           |                    | Additive Genetic ( $h^2$ )    | Permanent Environment | Birth Year         | Capture Year       | Mother Identity    | Plate ID           | Run Date           | Residual           |
| Anti-Tc IgA | Lambs  | 0.2529    | 0.741 | 2030 | 2030      | 0.2483<br>(0.0099) | 0.3890<br>(0.0372)            | NA<br>NA              | 0.0529<br>(0.0202) | NA<br>NA           | 0.0436<br>(0.0188) | 0.0157<br>(0.0098) | 0.0000<br>(0.0000) | 0.4989<br>(0.0366) |
|             | Adults | 0.3051    | 1.507 | 3793 | 1321      | 0.3048<br>(0.0134) | 0.5732<br>(0.0363)            | 0.1863<br>(0.0303)    | 0.0102<br>(0.0068) | 0.0052<br>(0.0035) | 0.0000<br>(0.0000) | 0.0242<br>(0.0075) | 0.0032<br>(0.0068) | 0.1977<br>(0.0101) |
| Anti-Tc IgE | Lambs  | 0.0138    | 0.086 | 2035 | 2035      | 0.0135<br>(0.0005) | 0.2122<br>(0.0334)            | NA<br>NA              | 0.0305<br>(0.0153) | NA<br>NA           | 0.0067<br>(0.0174) | 0.0288<br>(0.0132) | 0.0000<br>(0.0000) | 0.7219<br>(0.0360) |
|             | Adults | 0.1835    | 0.733 | 3798 | 1321      | 0.1739<br>(0.0071) | 0.4662<br>(0.0385)            | 0.2531<br>(0.0368)    | 0.0000<br>(0.0000) | 0.0134<br>(0.0057) | 0.0047<br>(0.0182) | 0.0208<br>(0.0055) | 0.0000<br>(0.0000) | 0.2418<br>(0.0117) |
| Anti-Tc IgG | Lambs  | 0.0364    | 0.236 | 2032 | 2032      | 0.0354<br>(0.0015) | 0.2739<br>(0.0344)            | NA<br>NA              | 0.0703<br>(0.0266) | NA<br>NA           | 0.0203<br>(0.0184) | 0.0411<br>(0.0161) | 0.0000<br>(0.0000) | 0.5944<br>(0.0381) |
|             | Adults | 0.0462    | 0.630 | 3776 | 1319      | 0.0468<br>(0.0021) | 0.2347<br>(0.0330)            | 0.2854<br>(0.0296)    | 0.0027<br>(0.0048) | 0.0180<br>(0.0101) | 0.0000<br>(0.0000) | 0.0618<br>(0.0172) | 0.0803<br>(0.0300) | 0.3172<br>(0.0159) |

794

795

796 **Table 2.** SNPs showing the strongest association with anti-*T. circumcincta* IgA, IgE and IgG levels in lambs and adults. The P-values provided in this table  
797 have not been corrected using genomic control to allow comparisons between directly genotyped and imputed SNPs. Asterisks next to the SNP name indicate  
798 that the most highly associated SNP was imputed from the high-density SNP chip. N 50K and N HD indicate how many SNPs were significantly associated  
799 with the trait in the same region for the 50K and HD SNP chips, respectively. A and B indicate the reference and alternate alleles at each SNP. MAF indicates  
800 the minor allele frequency (allele B); for imputed SNPs, this was calculated using the HD chip data only and not imputed genotypes. Effects AA, AB and BB  
801 are the effect sizes as calculated from the associated animal model. Full results including corrected P values are provided in Tables S5 and S6; gene and GO  
802 information is provided in Tables S7 & S8. Lamb IgE associations are given for the log<sub>10</sub> of the antibody measures (see Methods).

803  
804

| Trait          | Age    | Chr | Position | Highest Associated SNP | N 50K | N HD | P                    | A | B | MAF   | Effect AA | Effect AB | Effect BB | Prop V <sub>A</sub> Explained | Closest Gene   | Candidate Genes in Region     |
|----------------|--------|-----|----------|------------------------|-------|------|----------------------|---|---|-------|-----------|-----------|-----------|-------------------------------|----------------|-------------------------------|
| Anti-Tc<br>IgA | Lambs  | 18  | 68137231 | s03219.1               | 1     | 33   | 1.47e <sup>-07</sup> | A | G | 0.328 | 0.000     | 0.091     | 0.202     | 0.101                         | <i>CDCA4</i>   | <i>IGH</i> complex            |
|                |        | 20  | 25196550 | oar3_OAR20_25196550*   | 0     | 1    | 1.96e <sup>-06</sup> | A | G | 0.490 | 0.000     | -0.083    | -0.175    | 0.136                         | <i>ELOVL5</i>  | MHC II locus                  |
|                |        | 24  | 10616039 | oar3_OAR24_10616039*   | 6     | 118  | 4.08e <sup>-39</sup> | A | G | 0.484 | 0.000     | -0.192    | -0.424    | 0.200                         | <i>GSPT1</i>   | <i>CIITA</i> , <i>CLEC16A</i> |
|                | Adults | 24  | 10858856 | oar3_OAR24_10858856*   | 25    | 383  | 5.74e <sup>-71</sup> | A | G | 0.472 | 0.000     | -0.383    | -0.718    | 0.272                         | <i>SNX29</i>   | <i>CIITA</i> , <i>CLEC16A</i> |
| Anti-Tc<br>IgE | Lambs  | 10  | 10333145 | oar3_OAR10_10333145*   | 1     | 2    | 2.91e <sup>-07</sup> | G | A | 0.023 | 2.929     | 2.819     | 0.000     | 0.000                         | <i>OLFM4</i>   | <i>OLFM4</i>                  |
|                | Adults | 20  | 25781566 | OAR20_27259292.1*      | 3     | 25   | 5.09e <sup>-09</sup> | A | G | 0.386 | 0.000     | -0.061    | -0.220    | 0.080                         | <i>HLA-DRA</i> | MHC II locus                  |
| Anti-Tc<br>IgG | Lambs  | 16  | 12632988 | oar3_OAR16_12632988*   | 1     | 31   | 5.20e <sup>-07</sup> | A | G | 0.036 | 0.000     | 0.026     | 0.529     | 0.020                         | <i>MAST4</i>   | <i>CD180</i>                  |
|                |        | 20  | 30876754 | oar3_OAR20_30876754*   | 1     | 6    | 2.44e <sup>-07</sup> | G | A | 0.211 | -0.104    | -0.072    | 0.000     | 0.077                         | <i>TRIM38</i>  | MHC I/II                      |

805  
806

## 807 **Supplementary Information Description**

808

### 809 **Supplementary Figures**

810

811 **Figure S1.** Histograms of anti-*Teladorsagia circumcincta* IgA, IgE and IgG levels in lamb (left column)  
812 and adult (right column) Soay sheep.

813

814 **Figure S2.** Boxplots of anti-*Teladorsagia circumcincta* IgA, IgE and IgG levels with age and sex in  
815 Soay sheep.

816

817 **Figure S3.** Correlations between anti-*T. circumcincta* IgG, IgA, and IgE levels in lamb (A-C) and adult  
818 (D-F) Soay sheep. Model results are provided in Table S1.

819

820 **Figure S4.** Boxplots comparing anti-*T. circumcincta* IgG, IgA, and IgE levels between the sexes in  
821 lamb and adult Soay sheep.

822

823 **Figure S5.** Anti-*T. circumcincta* IgG, IgA, and IgE levels in lambs with age in days (left) and in adults  
824 with age in years (right). Animal model results are provided in Table S2.

825

826 **Figure S6.** Temporal correlations in anti-*Teladorsagia circumcincta* IgA, IgE and IgG levels in adult  
827 Soay sheep. Scatterplots of all raw data in adults for which there are two antibody measures in two  
828 consecutive years with a dashed line indicating a perfect 1:1 relationship and the solid line indicating  
829 the regression slope. Histograms show the frequency of the change in antibody levels for adults in  
830 consecutive years with a dashed line indicating no change.

831

832 **Figure S7:** Distribution of observed vs expected P-values under a null  $\chi^2$  with 2 degrees of freedom  
833 for the GWAS of anti-*Teladorsagia circumcincta* IgA, IgE and IgG levels in lambs and adults. The  
834 dotted line indicates the genome-wide significance threshold, and the solid line indicates a 1:1  
835 correspondence between the observed and expected values.

836

837 **Figure S8.** Local association of anti-*Teladorsagia circumcincta* IgA (a-d), IgE (e-f) and IgG (g-h)  
838 levels in lamb and adult Soay sheep with SNP50 and imputed SNP loci at the most highly associated  
839 regions. The dotted line indicates the genome-wide significance threshold equivalent to an  
840 experiment-wide threshold of  $P = 0.05$ . Points are colour-coded by their imputation status i.e. from  
841 the SNP50 chip (red points) or imputed from the Ovine HD chip (black triangles). Underlying data,  
842 sample sizes and effect sizes are provided in Table S6. Gene positions are shown in the grey panel at  
843 the top of each plot and were obtained from Ensembl (gene build ID Oar\_v3.1.94) and are provided in  
844 Table S7. Genes coloured red have GO terms associated with immune traits (Table S8).

845

### 846 **Supplementary Tables**

847

848 **Table S1:** Correlations between anti-*Teladorsagia circumcincta* antibody levels in lambs and adults.  
849 Slope, intercept, adjusted  $R^2$  and P-values are given for linear regressions.

850

851 **Table S2.** Fixed effects results from animal models of anti-*Teladorsagia circumcincta* IgA, IgE and  
852 IgG for lambs, and adults. Age is the age in days during the August catch for lambs, and age in years  
853 for adults. Wald statistics are given for the significance of each effect as included in the model.

854

855 **Table S3.** Random effects results from animal models of anti-*Teladorsagia circumcincta* IgA, IgE  
856 and IgG for lambs and adults. Wald statistics are given for the significance of each effect as included  
857 in the model. Sample sizes are provided in Table 1. Fixed effect structures and results are provided in  
858 Table S2.

859

860 **Table S4.** Temporal correlations in anti-*Teladorsagia circumcincta* IgA, IgE and IgG levels at time t  
861 and t+1 (in years) as shown in Figure S4. Results are from a linear regression with t+1 levels as the  
862 response variable.

863

864 **Table S5.** Full GWAS results for animal models of anti-*Teladorsagia circumcincta* IgA, IgE and IgG  
865 in lambs and adults, fitting SNP genotype as a factor. A and B indicate the reference and alternate  
866 allele at each SNP. CallRate is the genotyping success of the locus on the SNP50 BeadChip. MAF is  
867 the frequency of allele B (minor allele frequency). Wald P and Wald P Corrected are the association  
868 P-values before and after correction with genomic control  $\lambda$ , respectively. Significant indicates if the  
869 SNP was significantly associated with trait variation after correcting for multiple testing. Effect AA,  
870 AB and BB are the effect sizes from the animal model for each genotype relative to the model  
871 intercept.

872

873 **Table S6.** Full association results for animal models of anti-*Teladorsagia circumcincta* IgA, IgE and  
874 IgG in lambs and adults, fitting imputed SNP genotypes as a factor. SNP.Type indicates whether the  
875 SNP was imputed from the HD chip or from the SNP50 BeadChip (unknown genotypes are also  
876 imputed for the SNP50 BeadChip in this analysis meaning that results will not exactly match those of  
877 Table S5). A and B indicate the reference and alternate allele at each SNP. ImputeSuccess is the  
878 imputation success reported from the AlphaImpute analysis. MAF is the frequency of allele B (minor  
879 allele frequency). Wald P are the association P-values that have not been corrected for genomic  
880 control (see main text). Effect AA, AB and BB are the effect sizes from the animal model for each  
881 genotype relative to the model intercept.

882

883 **Table S7.** Gene information in regions significantly associated with anti-*Teladorsagia circumcincta*  
884 IgA, IgE and IgG in lambs and adults, obtained from the Ensembl Gene build Oar\_v3.1.94. Start and  
885 stop indicate the gene start and stop positions. Strand indicates whether transcription occurs in the  
886 forward or reverse strand. Gene\_id is the Ensembl identifier for the gene. Gene\_name is the gene  
887 name associated with the gene\_id. Gene\_biotype indicates the type of gene (i.e. protein coding, RNA  
888 etc). Orthologue is the gene name of orthologues associated with the gene ID, with orthologue count  
889 giving the number of unique orthologues. Consensus locus is the gene name or likely gene name  
890 based on orthology.

891

892 **Table S8.** Gene Ontology information for loci (including orthologues) in Table S7 that are associated  
893 with immune and antibody phenotypes in humans (hsapiens), mice (mmusculus), cattle (btaurus) and  
894 sheep (oaries) obtained using biomaRt. Column names are as for Table S7, including the following:  
895 gene\_id is the sheep gene ID; Species = species as previous; ensembl\_gene\_id is the gene ID within  
896 that Species; external\_gene\_name is the gene name for that species; description is the full gene name;  
897 phenotype\_description is a description of phenotypes associated with the gene; go\_id is the GO term  
898 identifier; name\_1006 is the GO term name; definition\_1006 is the GO term definition.
